# Supplementary material for: Pharmacological interventions for challenging behaviour in children with intellectual disabilities: a systematic review and meta-analysis
Source: Springer Nature journal article supplement (doi:10.1186/s12888-015-0688-2), 2015-11-26
Supplement: MOESM2 [file 9748300]

## **Pharmacological [generic – this answered all RQs answerable via RCTs].**

### Medline – OVID SP

- 1 developmental disabilities/ or exp intellectual disability/ or exp learning disorders/ or mentally disabled persons/  
((intellect\* adj (deficien\* or difficult\* or disab\* or disorder\* or impair\* or handicap\* or incapacit\* or sub?average or sub?norm\*)) or (low\*2 adj2 intellect\*) or (learning adj (deficien\* or difficult\* or disab\* or disorder\* or handicap\* or impair\* or incapacit\* or handicap\* or sub?average or sub?norm\*)) or (mental\* adj (deficien\* or disab\* or handicap\* or impair\* or handicap\* or incapacit\* or retard\* or sub?average or sub?norm\*))) .ti,ab.
- 2
- 3 ((sub?average or sub?normal\*) adj3 (child\* or cognit\* or intel\*) .tw.
- 4 ((development\* or neurodevelopment\*) adj disab\*) .tw.
- 5 (education\* adj5 sub?norm\*) .tw.
- 6 (cretin\* or feeble?minded\* or imbecil\* or moron\*) .tw.
- 7 (handicap\* or multiple disabilit\* or developmental delay\*) .ti,ab.
- 8 angelman syndrome/ or down syndrome/ or fragile x syndrome/  
(((angelman or happy puppet) adj2 syndrom\*) or (down\*1 adj (disease or syndrome\*))
- 9 or bell martin or fragile x or gillian turner or martin bell or turner gillian or x chromosome fragility or (escalante\* adj (disease or syndrome\*))) .ti,ab.
- 10 autistic disorder/ or asperger syndrome/
- 11 (autis\* or asperger\* or pervasive developmen\* disorder\* or rett\*1) .ti,ab.
- 12 ((communicat\* adj2 impair\*) or ((complex or high support) adj3 needs) or dyslex\* or ((language or speech) adj2 (delay\* or disorder\*))) .ti,ab. or dyslexi\* .sh.
- 13 or/1-12
- 14 behav\* .ti,ab,hw.
- 15 acting out/ or exp domestic violence/ or exp aggression/ or exp anger/ or dangerous behavior/ or hate/ or hostility/ or sexual harrassment/ or torture/ or violence/  
(abus\* or aggress\* or agitat\* or agonistic or anger or angry or assault\* or attack\* or
- 16 bizarre or combative or danger\* or destruct\* or disrupt\* or disturb\* or harass\* or hostil\* or intimidat\* or rage\* or threat\* or un?toward or violen\*) .ti,ab.
- 17 overdose/ or self-injurious behavior/ or self mutilation/ or stereotypic movement disorder/ or suicide/ or suicidal ideation/ or suicide, attempted/  
(auto?aggress\* or auto?mutilat\* or cutt\* or overdos\* or para?suicid\* or (self adj2 cut\*)
- 18 or self?damag\* or self?destruct\* or self?harm\* or self?hurt\* or self?inflict\* or self?injur\* or self?mutilat\* or self?poison\* or self?wound\* or suicid\*) .ti,ab.
- 19 impulse control disorders/
- 20 ((impulse control disorder\*) or (explosive adj2 disorder)) .ti,ab.
- 21 exp child behavior/ or conduct disorder/
- 22 (conduct\* or (oppositional adj3 (defiant\* or disorder\*))) .ti,ab.
- 23 (attenti\* or disrupt\* or impulsiv\* or inattenti\*) .sh.

- 24 (attenti\* adj3 (adolescen\* or adult\* or behav\* or child\* or class or classes or classroom\* or condition\* or difficult\* or disorder\* or learn\* or people or person\* or poor or problem\* or process\* or youngster\*)).ti,ab.
- 25 (impulsiv\* or inattentiv\* or adhd or (attenti\* adj3 deficit\*) or hyperactiv\* or (hyper adj1 activ\*) or hyperkin\*).ti,ab. or (overactiv\*.tw. not overactive bladder\*.ti.)
- 26 "conflict (psychology)"/ or firesetting behavior/ or fraud/ or juvenile delinquency/ or rape/ or sex offences/ or theft/ or torture/
- ((adjust\* adj2 (difficult\* or problem\*)) or anti?social\* or arson or asbo or asocial or bully\* or bullie\* or callous\* or delinquen\* or deviant\* or (fire\* adj2 (alight or set\* or start\*)) or mal?adjust\* or psychopath\* or pyromani\* or shop?lift\* or steal\* or temper\*1 or theft\* or unemotional trait\* or vandali\* or (sex\* adj2 (abus\* or harass\* or offen\*)) or ((social or unemotional) adj (difficult\* or problem\*)) or non?complan\*).ti,ab.
- 27
- 28 (repetitiv\* or self stimulat\* or stereotyp\* or sucking).hw.
- ((crumpl\* or tear\*) adj2 paper\*) or fingering\* or (finger\* adj2 (flex\* or tap\*)) or flapping or knee shaking or humming or ((loud\* or nois\*) adj2 (instrument\* or vocali\*)) or lip pucker\* or repetitive\* or ritualistic or (rocking or (body adj2 rock\*)) or (self stimulat\* or selfstimulat\*) or staring or stemming or stereotyp\* or (thumb adj2 suck\*) or (wav\* adj2 (arm\* or hand\*))).ti,ab.
- 29
- 30 wander\*.ti,ab,hw.
- 31 withdrawn\*.ti,ab,hw.
- 32 or/14-31
- 33 13 and 32

#### Systematic review study design filter: Medline – OVID SP

- 1 meta analysis.sh,pt. or "meta-analysis as topic"/ or "review literature as topic"/
- 2 (exp databases, bibliographic/ or (((electronic or computer\$ or online) adj database\$) or bids or cochrane or embase or index medicus or isi citation or medline or psyclit or psychlit or scisearch or science citation or (web adj2 science)).ti,ab.) and (review\$.ti,ab,sh,pt. or systematic\$.ti,ab.)
- 3 ((analy\$ or assessment\$ or evidence\$ or methodol\$ or quantitativ\$ or systematic\$) adj2 (overview\$ or review\$)).tw. or ((analy\$ or assessment\$ or evidence\$ or methodol\$ or quantitativ\$ or systematic\$).ti. and review\$.ti,pt.) or (systematic\$ adj2 search\$).ti,ab.
- 4 (metaanal\$ or meta anal\$).ti,ab.
- 5 (research adj (review\$ or integration)).ti,ab.
- 6 reference list\$.ab.
- 7 bibliograph\$.ab.
- 8 published studies.ab.
- 9 relevant journals.ab.
- 10 selection criteria.ab.
- 11 (data adj (extraction or synthesis)).ab.
- 12 (handsearch\$ or ((hand or manual) adj search\$)).ti,ab.
- 13 (mantel haenszel or peto or dersimonian or der simonian).ti,ab.
- 14 (fixed effect\$ or random effect\$).ti,ab.
- 15 ((pool\$ or combined or combining) adj2 (data or trials or studies or results)).ti,ab.
- 16 or/1-15

- 1 exp clinical trial/ or exp “clinical trials as topic”/ or cross-over studies/ or double-blind method/ or placebos/ or random allocation/ or single-blind method/
- 2 (clinical adj2 trial\$.ti,ab.
- 3 (crossover or cross over).ti,ab.
- 4 (((single\$ or doubl\$ or trebl\$ or tripl\$) adj2 blind\$) or mask\$ or dummy or doubleblind\$ or singleblind\$ or trebleblind\$ or tripleblind\$.ti,ab.
- 5 (placebo\$ or random\$).ti,ab.
- 6 animal\$/ not human\$/ use mesz, prem
- 7 or/1-5 not 6
